# Supplementary material for: Degradation and adsorption of SF6 decomposition components using AlN nanocones: a combined DFT and ab initio molecular dynamics study
Source: Royal Society of Chemistry journal article supplement (doi:10.1039/d3en00735a), 2023-12-20
Supplement: d3en00735a1.pdf [file d3en00735a1.pdf]

## Supporting information

### **Degradation and adsorption of SF<sub>6</sub> decomposition components using AlN nanocones: a combination of DFT and ab initio molecular dynamics study**

Mohammad Hassan Hadizadeh<sup>a,c</sup>, Yongxia Hu<sup>a</sup>, Fei Xu<sup>a,b,\*</sup>, Wenxing Wang<sup>a</sup>

<sup>a</sup>Environment Research Institute, Shandong University, Qingdao 266237, China

<sup>b</sup>Shenzhen Research Institute of Shandong University, Shenzhen 518057, China

<sup>c</sup>International Center for Quantum Design of Functional Materials (ICQD), Hefei National Laboratory for Physical Sciences at the Microscale, and Synergetic Innovation Center of Quantum Information and Quantum Physics, University of Science and Technology of China, Hefei, Anhui 230026, China

\*Corresponding authors.

*E-mail address* : xufei@sdu.edu.cn.

*Fax*: 86-532-5863 1986

## The molecular electrostatic potential surface

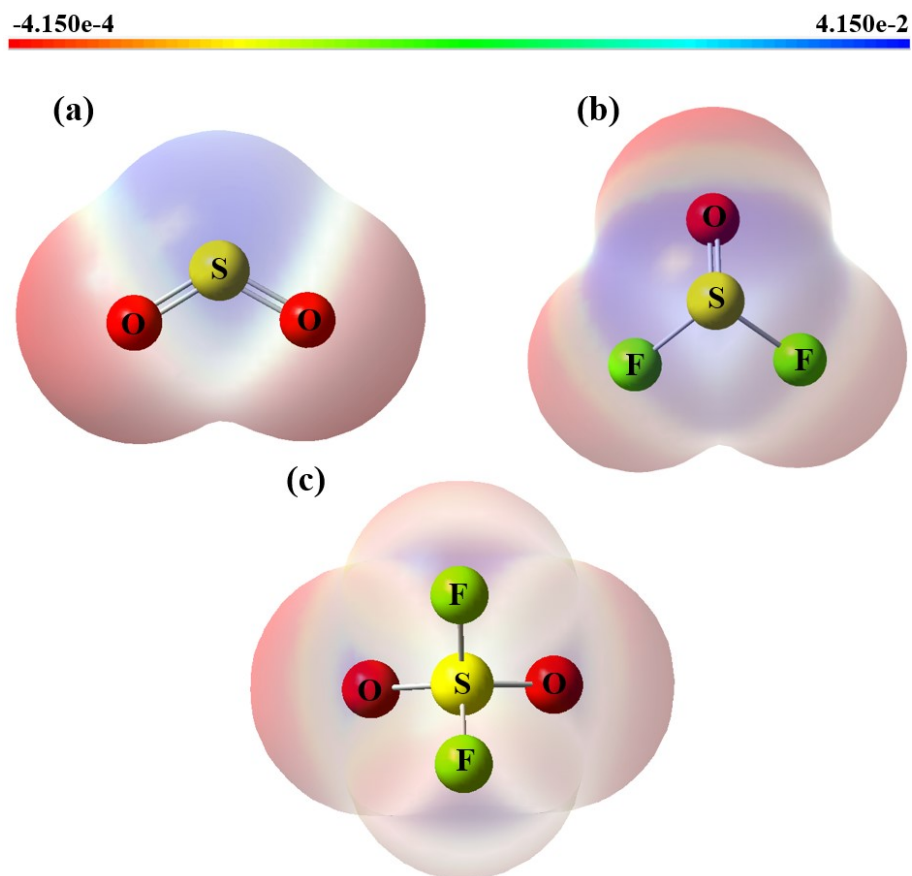

**Figure S1.** Molecular electrostatic potential surface of (a) SO<sub>2</sub>, (b) SOF<sub>2</sub>, and (c) SO<sub>2</sub>F<sub>2</sub> gas molecules. Where the red color indicates areas of high negative potential, while blue color represents regions of high positive potential. The intensity of the red or blue color reflects the magnitude of the potential.

## The HOMO-LUMO profiles

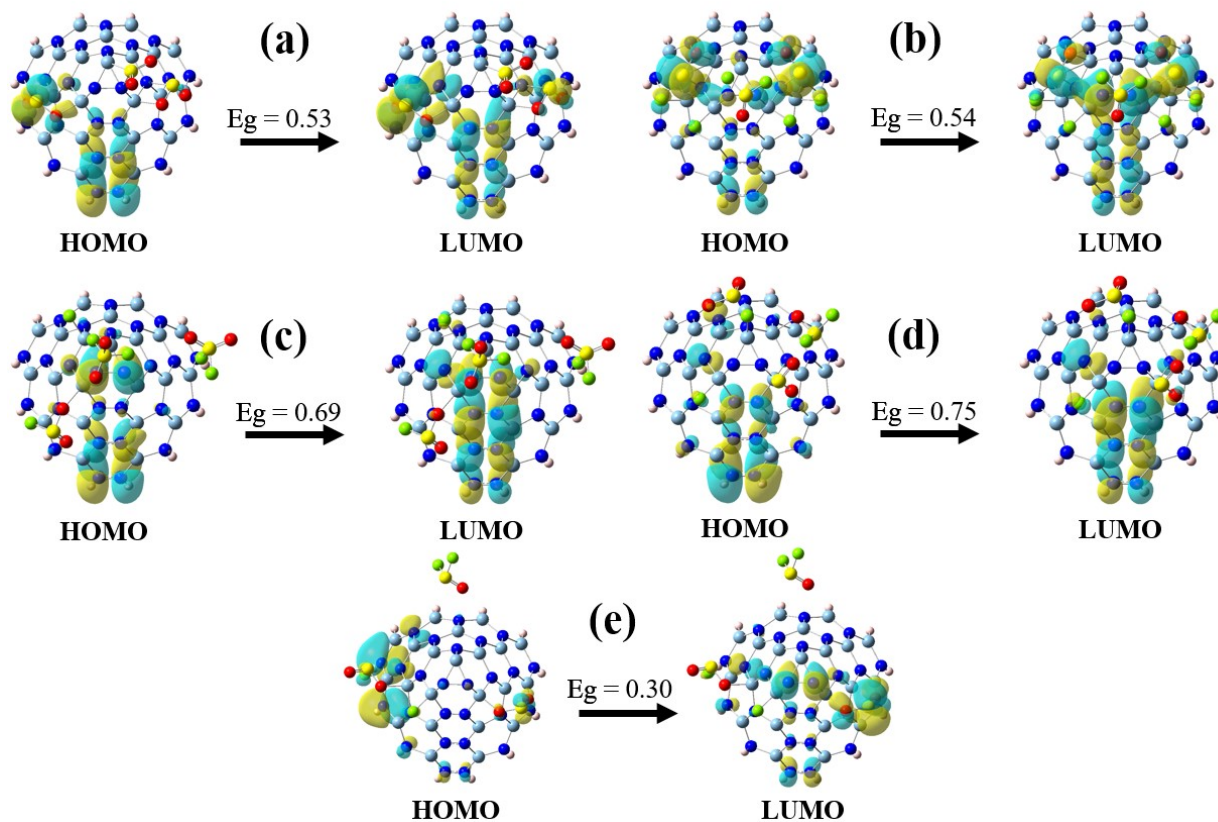

**Figure S2.** HOMO-LUMO profiles related to dominant structure of (a) AlNNC@SO<sub>2</sub>, (b) AlNNC@SOF<sub>2</sub>, (c) AlNNC@SO<sub>2</sub>F<sub>2</sub>, (d) AlNNC@Top, (e) AlNNC@Side systems. Where  $E_g$  is energy gap between HOMO-LUMO in eV.

## The angle distributions of $\text{AlNNC@SO}_2$ , $\text{AlNNC@SOF}_2$ , $\text{AlNNC@SO}_2\text{F}_2$ , and $\text{AlNNC@Side}$

In the case of  $\text{AlNNC@SO}_2$ , O1-Al1 creates a strong about ( $97^\circ$ ,  $1.85 \text{ \AA}$ ) while O2-Al3 creates a weaker bond varied about  $1.9\text{-}2.0 \text{ \AA}$ . Where diagonal angular changes of  $\theta_2$  and  $\theta_3$  along with variable S2-N2 bond length around  $1.85\text{-}1.95 \text{ \AA}$ , indicate the tendency of S3 to make a bond with N. In addition, O3-S3-O4 can make a stronger bond from its O3 side ( $105^\circ$ ,  $1.88 \text{ \AA}$ ) with Al2, **Figure S3**.

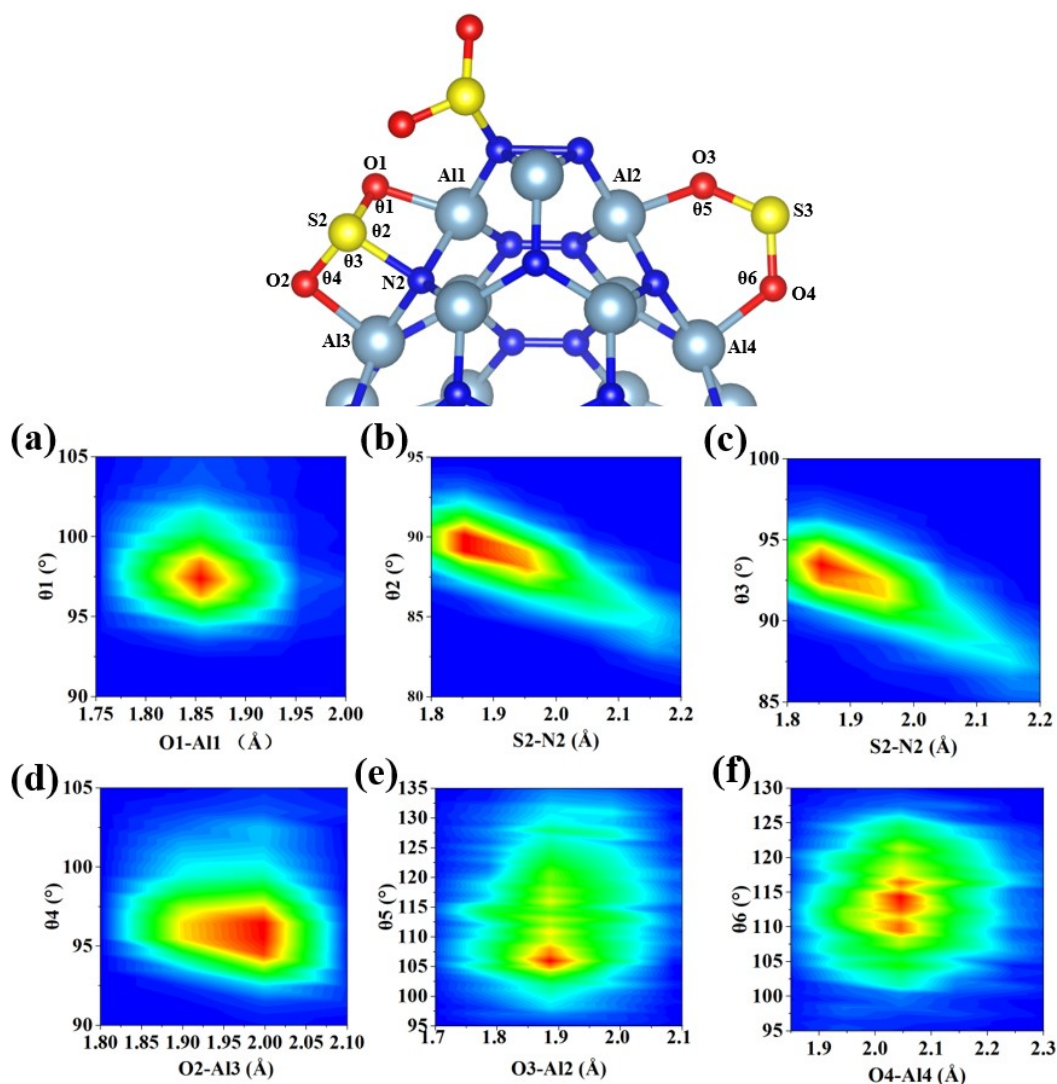

**Figure S3.** Angular analysis related to dominant structure of  $\text{AlNNC@SO}_2$ .

The result of angular distribution for AlNNC@SOF<sub>2</sub> showed that each of S1-O1 and S2-O2 forms a strong quadrilateral cluster with AlNNC surface, in which  $\theta_1$ ,  $\theta_2$ ,  $\theta_3$ , and  $\theta_4$  make angles about 93°. where S-N bonds (S1-N1 and S2-N2) make smaller bonds than O-Al bonds (O1-Al3 and O2-Al4), **Figure S4**.

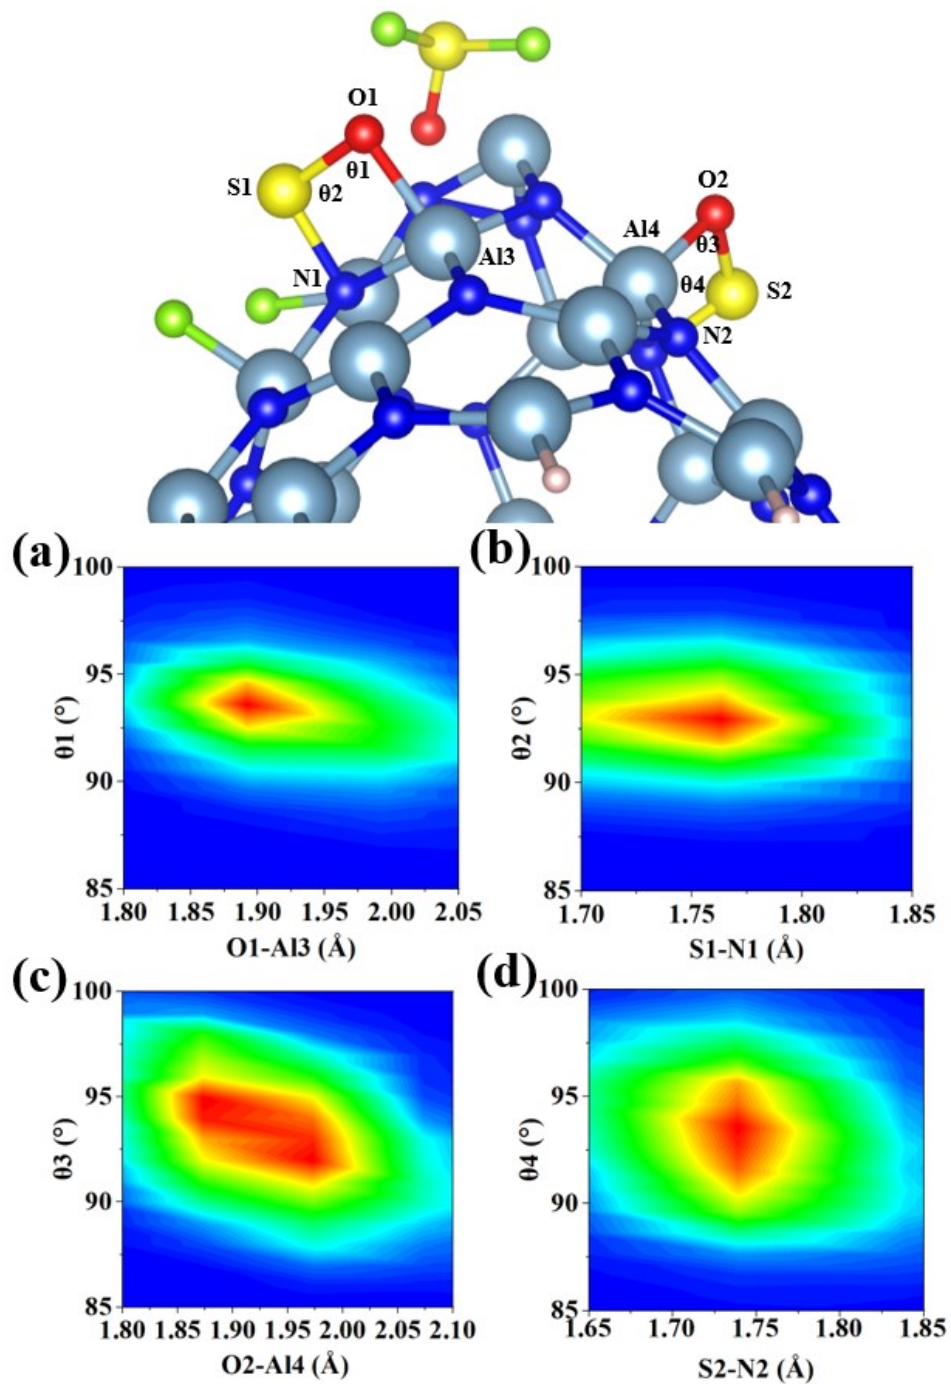

**Figure S4.** Angular analysis related to dominant structure of AlNNC@SOF<sub>2</sub>.

In the case of AlNNC@SO<sub>2</sub>F<sub>2</sub>, O1Al1 and O2Al3 almost make the same bond length with the AlNNC surface but with different angles; however,  $\theta_2$  can be more stable than  $\theta_1$ , which can be affected by the electronegativity of fluorine atom, **Figure S5**.

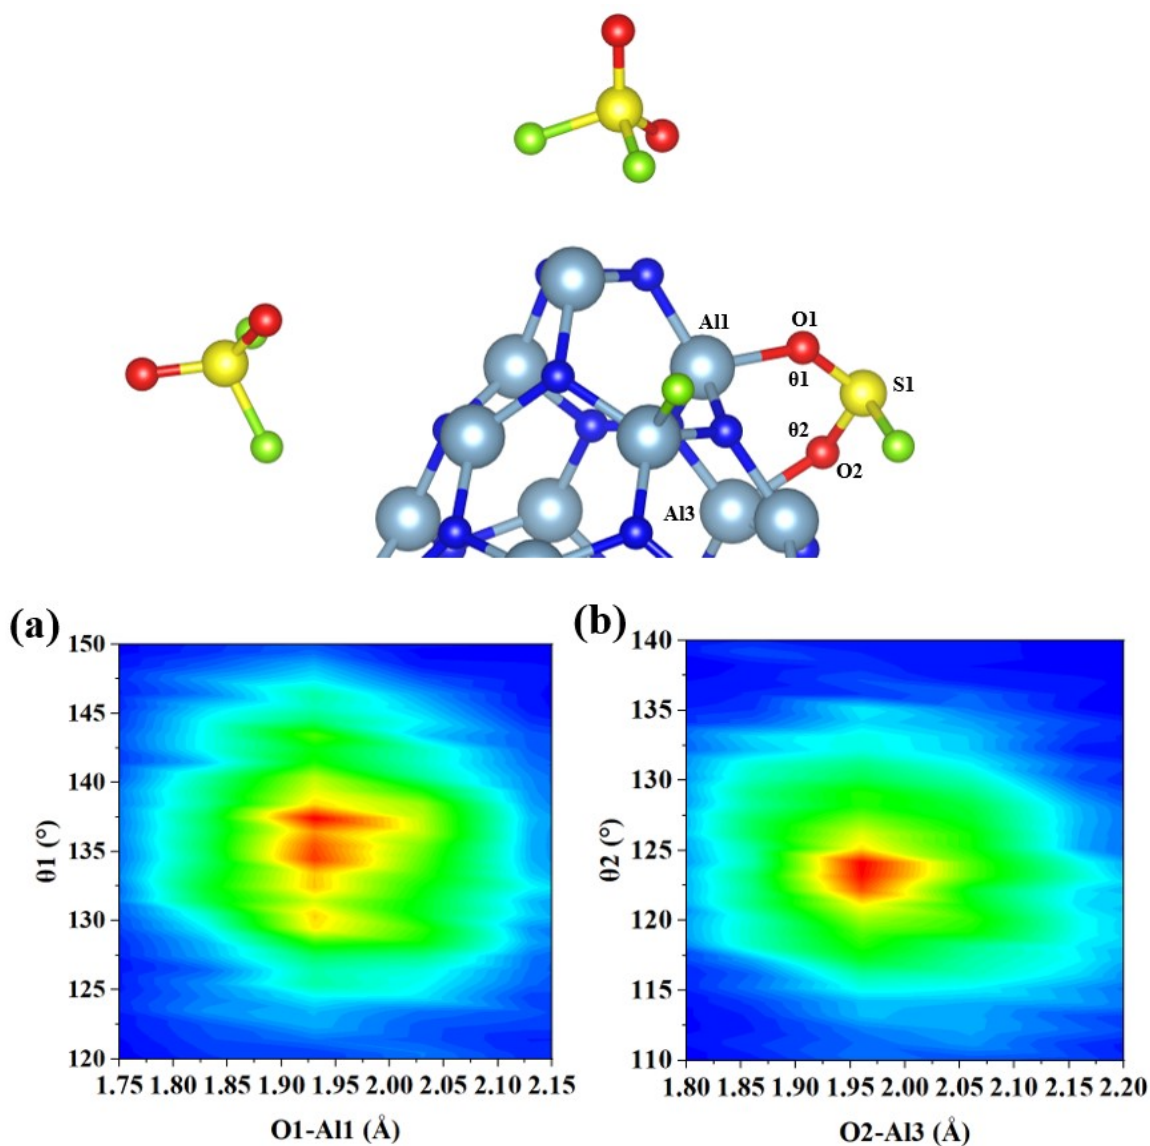

**Figure S5.** Angular analysis related to dominant structure of AlNNC@SO<sub>2</sub>F<sub>2</sub>.



In the case of AlNNC@Side, S1-O1 makes the strongest bond with AlNNC surface about  $<1.93$  Å bond length, while S2-O3 makes a weak but with stable angular to AlNNC about ( $134^\circ$ ,  $2.05$  Å), **Figure S6**.

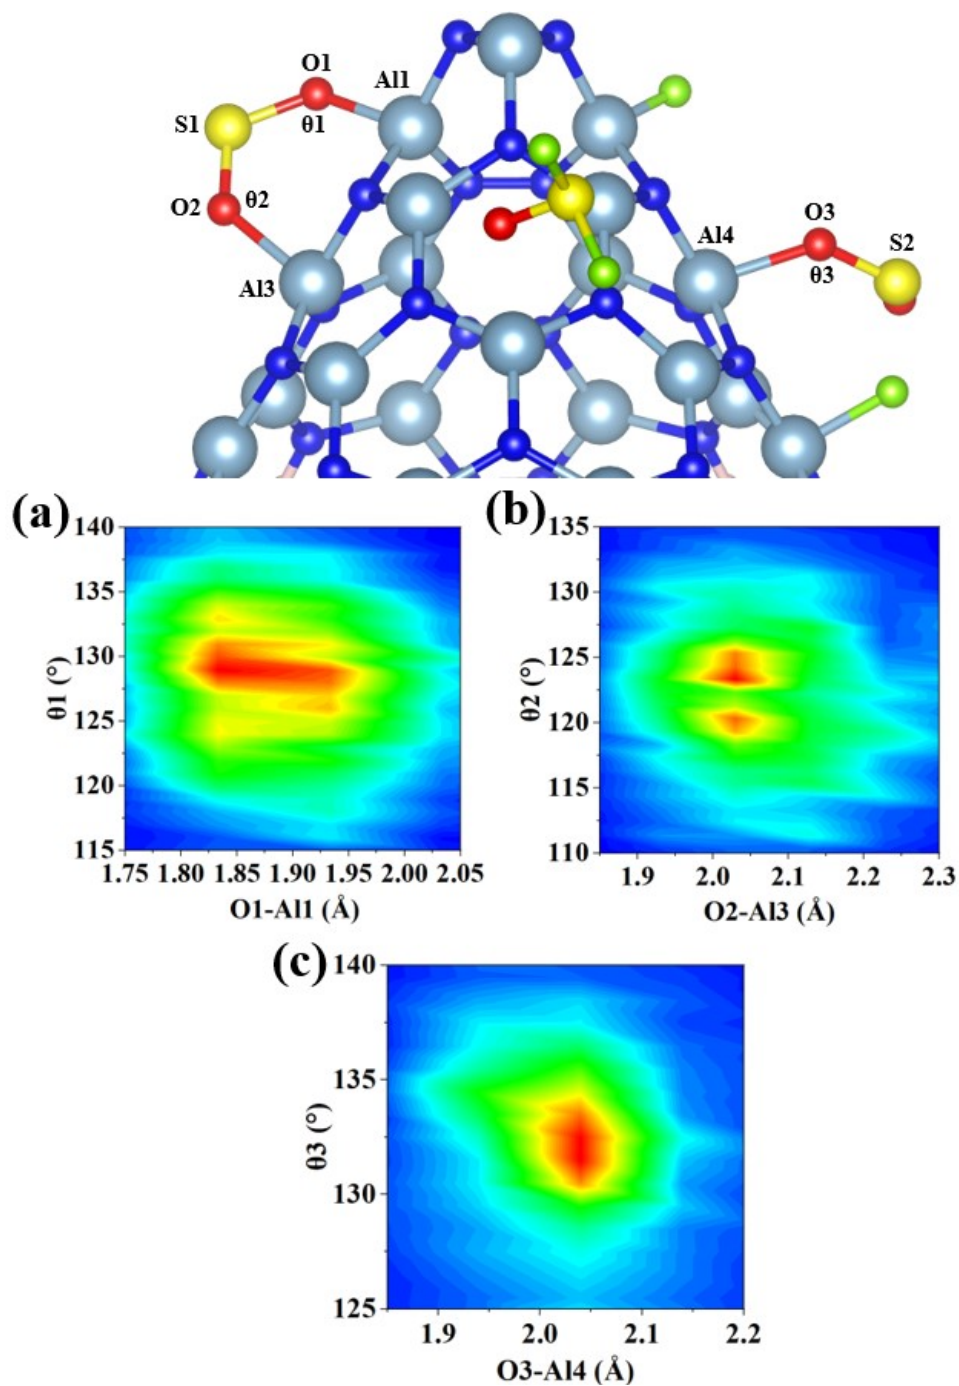

**Figure S6.** Angular analysis related to dominant structure of AlNNC@Side.

## The atomic partial charges in the most stable structures

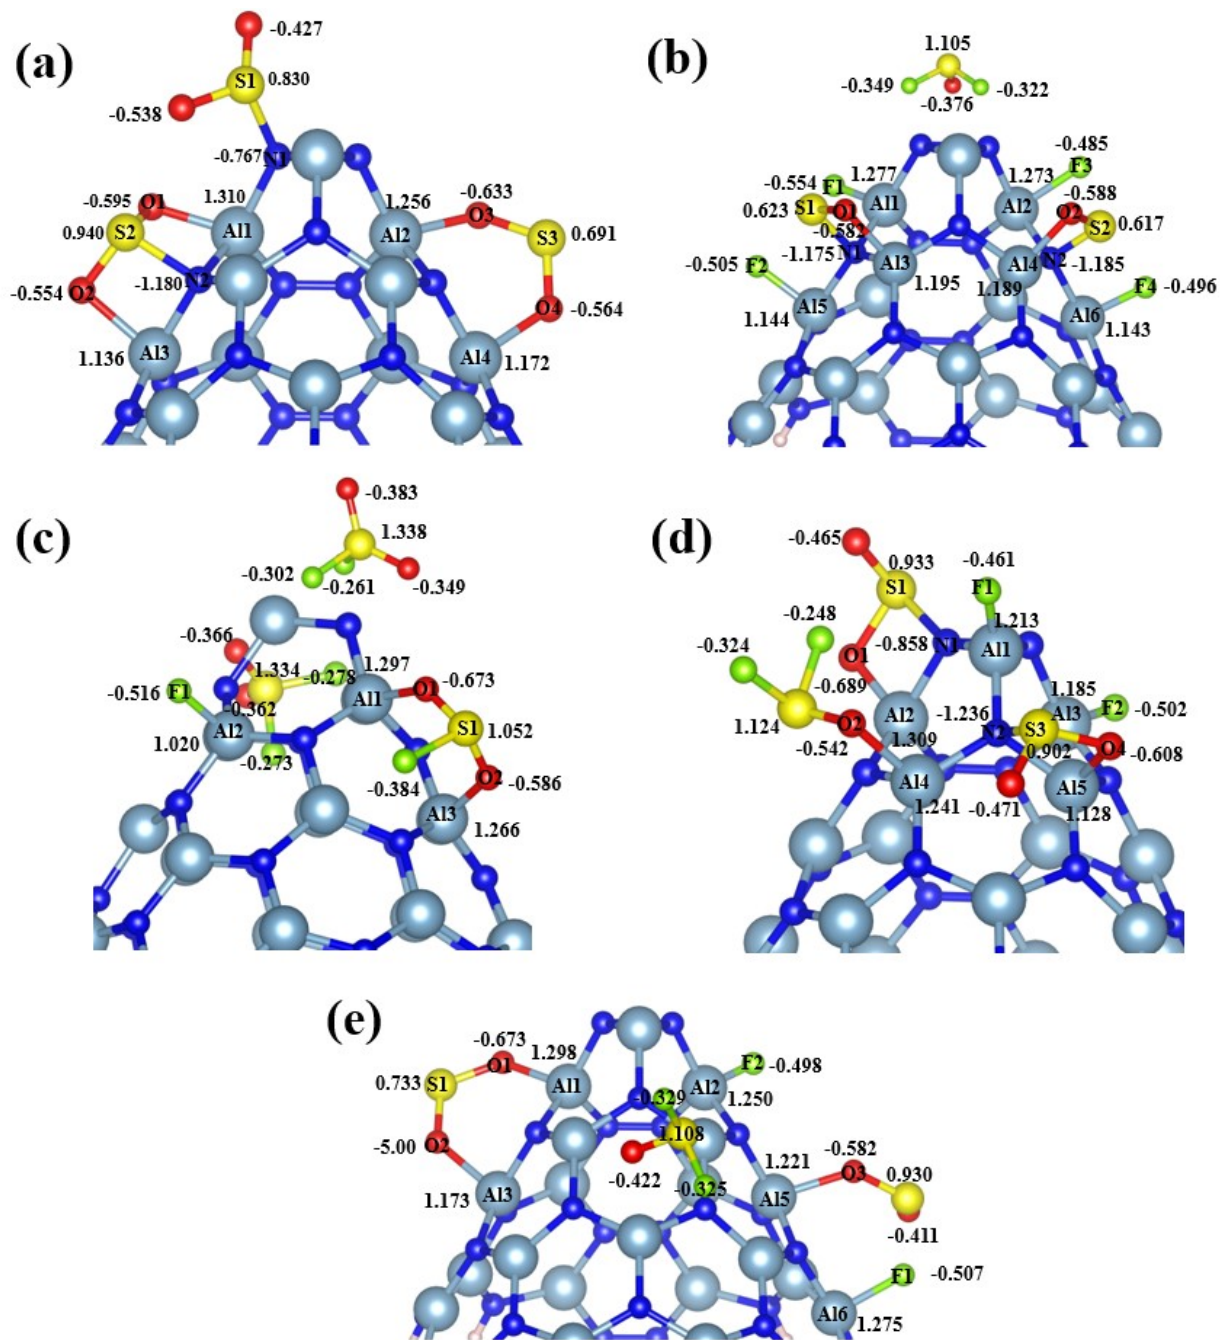

**Figure S7.** The atomic partial charges placed on the atoms in the most stable structures of (a) AINNC@SO<sub>2</sub>, (b) AINNC@SOF<sub>2</sub>, (c) AINNC@SO<sub>2</sub>F<sub>2</sub>, (d) AINNC@Top, (e) AINNC@Side systems



**Table S1.** The bond length of the most stable structures of AlNNC@SO<sub>2</sub>, AlNNC@SOF<sub>2</sub>, AlNNC@SO<sub>2</sub>F<sub>2</sub>, AlNNC@Top, and AlNNC@Side systems, along with their dipole moments.

|                                          | Bond                | Bond length(Å) | Dipole Moment |
|------------------------------------------|---------------------|----------------|---------------|
| <b>AlNNC@SO<sub>2</sub></b>              | R <sub>S1-N1</sub>  | 1.90           | 10.06         |
|                                          | R <sub>O1-Al1</sub> | 1.91           |               |
|                                          | R <sub>O3-Al2</sub> | 1.94           |               |
|                                          | R <sub>S2-N2</sub>  | 2.02           |               |
|                                          | R <sub>O2-Al3</sub> | 2.07           |               |
|                                          | R <sub>O4-Al4</sub> | 2.23           |               |
| <b>AlNNC@SOF<sub>2</sub></b>             | R <sub>F1-Al1</sub> | 1.67           | 12.58         |
|                                          | R <sub>F3-Al2</sub> | 1.83           |               |
|                                          | R <sub>S1-N1</sub>  | 1.85           |               |
|                                          | R <sub>O1-Al3</sub> | 1.98           |               |
|                                          | R <sub>O2-Al4</sub> | 1.87           |               |
|                                          | R <sub>S2-N2</sub>  | 1.74           |               |
|                                          | R <sub>F2-Al5</sub> | 1.86           |               |
| R <sub>F4-Al6</sub>                      | 1.83                |                |               |
| <b>AlNNC@SO<sub>2</sub>F<sub>2</sub></b> | R <sub>O1-Al1</sub> | 2.01           | 15.58         |
|                                          | R <sub>F1-Al2</sub> | 1.91           |               |
|                                          | R <sub>O2-Al3</sub> | 2.14           |               |
| <b>AlNNC@Top</b>                         | R <sub>F1-Al1</sub> | 1.70           | 26.90         |
|                                          | R <sub>S1-N1</sub>  | 1.90           |               |
|                                          | R <sub>O1-Al2</sub> | 1.88           |               |
|                                          | R <sub>F2-Al3</sub> | 1.80           |               |
|                                          | R <sub>S3-N2</sub>  | 2.01           |               |
|                                          | R <sub>O4-Al5</sub> | 2.09           |               |
|                                          | R <sub>O2-Al4</sub> | 2.02           |               |
| <b>AlNNC@Side</b>                        | R <sub>O1-Al1</sub> | 1.84           | 12.27         |
|                                          | R <sub>F2-Al2</sub> | 1.80           |               |
|                                          | R <sub>O2-Al3</sub> | 2.43           |               |
|                                          | R <sub>O3-Al5</sub> | 2.01           |               |
|                                          | R <sub>F1-Al6</sub> | 1.98           |               |

**The XYZ coordination of optimized pristine AlNNC with 180° disclination angle.**

60

|    |          |          |          |
|----|----------|----------|----------|
| Al | -1.67910 | 4.65890  | -8.55270 |
| N  | -0.69360 | 5.57400  | -9.92390 |
| N  | -3.45110 | 4.02180  | -8.90920 |
| Al | -1.65840 | 2.94150  | -5.75200 |
| N  | -0.69000 | 3.96300  | -7.06010 |
| N  | -3.21440 | 1.97190  | -6.32210 |
| Al | -4.07100 | 2.47480  | -7.96090 |
| Al | -4.97380 | -0.65360 | -8.46900 |
| N  | -5.18930 | 1.20910  | -8.87020 |
| N  | -5.37880 | -1.96210 | -9.80870 |
| Al | -1.69100 | 1.11060  | -3.08180 |
| N  | -0.68590 | 2.30670  | -4.21700 |
| N  | -2.51280 | -0.32430 | -4.06990 |
| Al | -3.44230 | 0.18160  | -5.66860 |
| Al | -3.06370 | -2.84870 | -6.89480 |
| N  | -3.99140 | -1.17170 | -6.90860 |
| N  | -3.13130 | -3.97230 | -8.44560 |
| Al | -4.43900 | -3.63240 | -9.80420 |
| Al | 0.00440  | -1.07990 | -1.36720 |
| N  | -0.85600 | 0.61220  | -1.42400 |
| N  | -0.00150 | -2.12320 | -2.97890 |
| Al | -1.60430 | -2.02070 | -4.04010 |
| Al | -0.00930 | -3.87980 | -6.24540 |
| N  | -1.65140 | -3.10340 | -5.62500 |
| N  | -0.01080 | -4.87460 | -7.88410 |
| Al | -1.66330 | -5.14930 | -8.81920 |
| Al | 1.69450  | 1.10710  | -3.09230 |
| N  | 0.86840  | 0.61000  | -1.42960 |
| N  | 2.50800  | -0.32920 | -4.08540 |
| Al | 1.59750  | -2.02440 | -4.04590 |
| Al | 3.04850  | -2.86550 | -6.89920 |
| N  | 1.63740  | -3.11200 | -5.62700 |
| N  | 3.11970  | -4.00470 | -8.43810 |
| Al | 1.64460  | -5.17410 | -8.80720 |
| Al | 1.64860  | 2.93780  | -5.76310 |
| N  | 0.68490  | 2.30480  | -4.22170 |
| N  | 3.19520  | 1.96200  | -6.34830 |
| Al | 3.42500  | 0.17280  | -5.69270 |
| Al | 4.93080  | -0.67250 | -8.50580 |
| N  | 3.96730  | -1.18400 | -6.93160 |
| N  | 5.34710  | -1.99390 | -9.82930 |
| Al | 4.43670  | -3.68040 | -9.79170 |
| Al | 1.65720  | 4.66720  | -8.55590 |

|    |          |          |           |
|----|----------|----------|-----------|
| N  | 0.67400  | 3.96410  | -7.06260  |
| N  | 3.42180  | 4.01950  | -8.92940  |
| Al | 4.03480  | 2.45990  | -7.99750  |
| N  | 5.12990  | 1.18780  | -8.92570  |
| N  | 0.66490  | 5.58410  | -9.92100  |
| H  | -4.50880 | -4.55790 | -11.05900 |
| H  | -1.65100 | -5.94000 | -10.16600 |
| H  | 1.63160  | -5.97800 | -10.14610 |
| H  | 4.53780  | -4.63800 | -11.01990 |
| H  | 5.87330  | -1.73700 | -10.63380 |
| H  | -5.91070 | -1.69990 | -10.60780 |
| H  | -5.61260 | 1.47050  | -9.73300  |
| H  | -3.88960 | 4.27080  | -9.76760  |
| H  | -1.18410 | 5.92670  | -10.71610 |
| H  | 1.15340  | 5.94700  | -10.70990 |
| H  | 3.85590  | 4.27050  | -9.78950  |
| H  | 5.53690  | 1.44460  | -9.79750  |
